# Supplementary material for: PPARαIs Required for PPARδAction in Regulation of Body Weight and Hepatic Steatosis in Mice
Source: Hindawi journal article supplement (doi:10.1155/2015/927057), 2015-01-01
Supplement: f1 [file 927057.f1.pdf]

**Supplementary Table 1** Sequences of oligonucleotide primers and probes used in Taqman real time PCR. All sequences are shown in 5'→3' order.

| Gene                | Forward primer              | Taqman probe (FAM-TAMRA)               | Reverse primer              |
|---------------------|-----------------------------|----------------------------------------|-----------------------------|
| human PPAR $\delta$ | GGGACCACAGCATGCAC<br>TTC    | CCAGCAGCTACACAGACCTCTCCCGG             | TGCAGTTGGTCCAGCAG<br>TGA    |
| mouse ADRP          | CAGCCAACGTCCGAGAT<br>TG     | TGCCAGTGCCAGAGGTGCCGT                  | CACATCCTTCGCCCCAGT          |
| mouse PPAR $\alpha$ | GCGCAGCTCGTACAGGT<br>CA     | CAAGAAGACCGAGTCCGACGCAGC               | TCTCTTGCAACAGTGGGT<br>GC    |
| mouse PPAR $\gamma$ | CTGACCCAATGGTTGCT<br>GATTAC | AAATATGACCTGAAGCTCCAAGAATA<br>CCAAAGTG | TGGAGATGCAGGTTCTA<br>CTTTGA |
| mouse PPAR $\delta$ | GACCAGAACACACGTTT<br>CCTTC  | AGCAGCTGTGCAGACCTCTCCAGA               | CCATCACAGCCCATCTGC<br>A     |
| mouse Acox1         | TGACCGTTAAGGTCTTT<br>GCAGA  | AACTCCCAAGATTCAAGACAGAGCC<br>GT        | AGGTTCTCAGCACGGCT<br>T      |
| mouse CPT1          | GGCTTAGTCGGGAGGCT<br>CTG    | AATCAACTCCTGGAAGAAACGCCTTAT<br>TCGAA   | ACCCCTAAGGATGCCATT<br>CTTG  |
| mouse FAS           | GGCATCATTGGGCACTC<br>CTT    | CCATCTGCATAGCCACAGGCAACCTC             | GCTGCAAGCACAGCCTCT<br>CT    |
| mouse ANGPTL<br>4   | GCTTTGCATCCTGGGAC<br>GAG    | ACTTGCTGGCTCACGGGCTGCTAC               | CCCTGACAAGCGTTACCA<br>CAG   |
| mouse PDK4          | GGAAGTATCGACCCAAA<br>CTGTGA | CACTCAAAGGCATCTTGACTACTGCT<br>ACCA     | GGTCGCAGAGCATCTTT<br>GC     |
